# Supplementary material for: Chemical vapor deposition of MoS2 layers from Mo–S–C–O–H system: thermodynamic modeling and validation
Source: Royal Society of Chemistry journal article supplement (doi:10.1039/c6cp01617k), 2016-01-01
Supplement: c6cp01617k1.pdf [file c6cp01617k1.pdf]

## Supporting Information

### **Chemical Vapor Deposition of MoS<sub>2</sub> Layers from Mo-S-C-O-H System: Thermodynamic Modeling and Validation**

Sukanya Dhar, V. Kranthi Kumar, Tanushree H. Choudhury, S.A. Shivashankar and S.  
Raghavan

Centre for Nano Science and Engineering, Indian Institute of Science, Bengaluru –  
560012, India

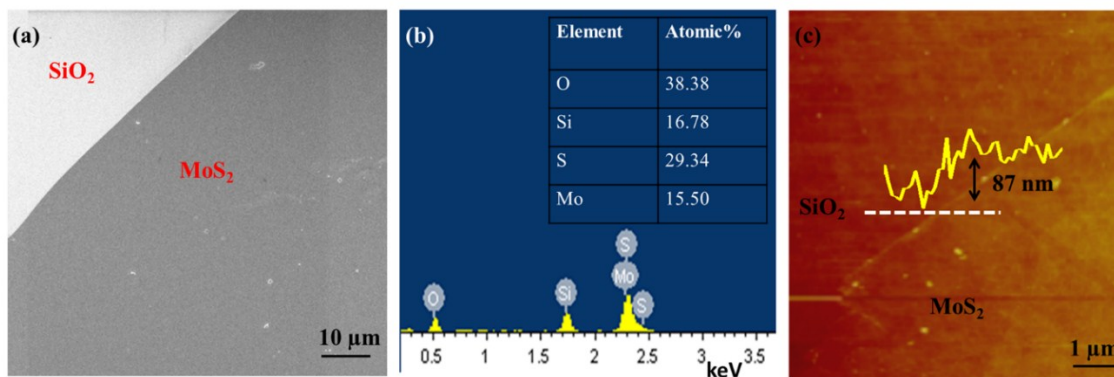

Figure S1(a). SEM image of MoS<sub>2</sub> film grown for 10 minutes on SiO<sub>2</sub>. (b) EDS analysis of the film. (c) AFM image of the MoS<sub>2</sub> film.

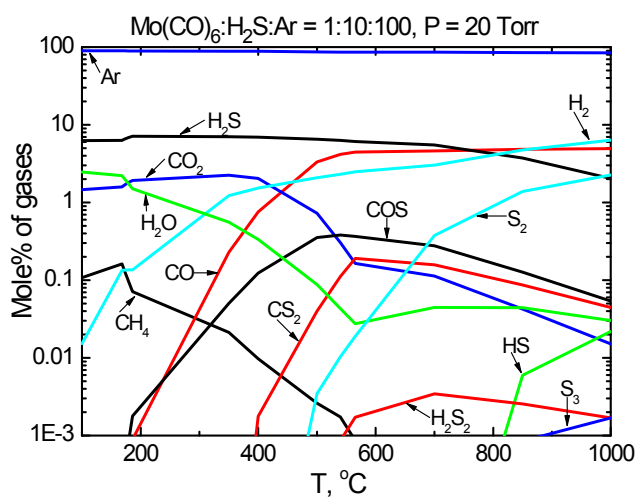

Figure S2. Mole% of gaseous phases formed in Ar ambient at 20 Torr.

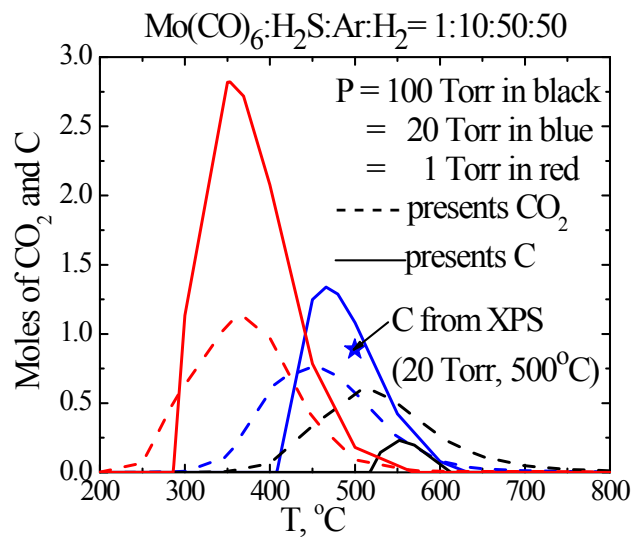

Figure S3. Composition of C and  $\text{CO}_2$  formed in  $\text{Ar}:\text{H}_2=50:50$  at different P.

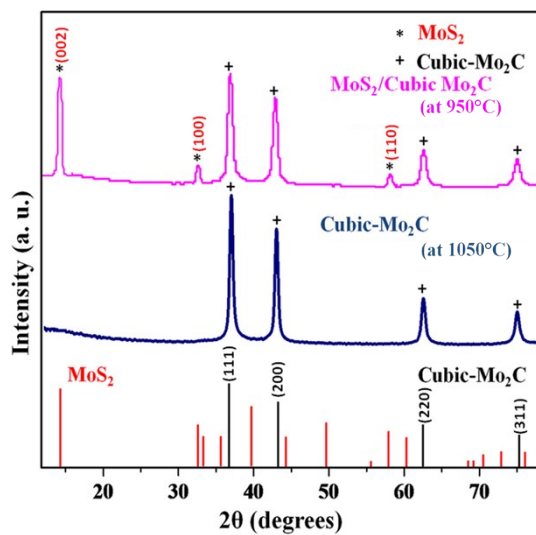

Figure S4. XRD validating theoretical prediction of  $\text{Mo}_2\text{C}-\text{MoS}_2$  and pure  $\text{Mo}_2\text{C}$  films at  $950^\circ\text{C}$  and  $1050^\circ\text{C}$  respectively, for high flow rate of  $\text{H}_2$  (1000 sccm) at 600 Torr.

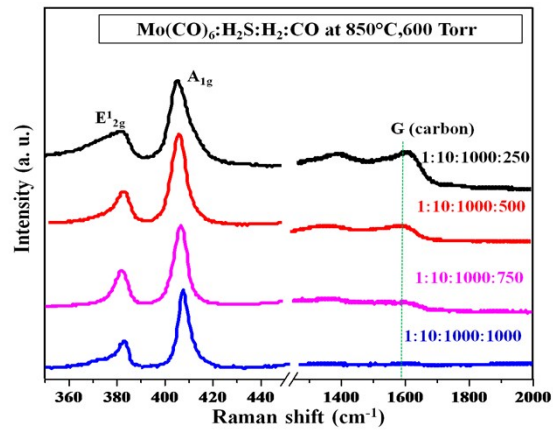

Figure S5. Raman spectra for  $h=1000$  sccm to estimate C content in the MoS<sub>2</sub>-C films at  $T = 850^{\circ}\text{C}$  and  $P = 600$  Torr.

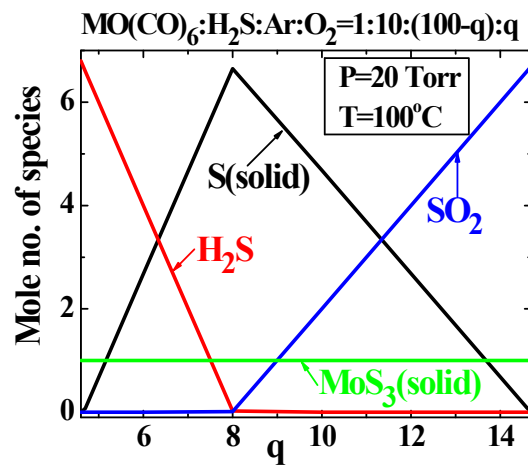

Figure S6. Gaseous and solid (S and MoS<sub>3</sub>) species with O<sub>2</sub> leak in Ar ambient.

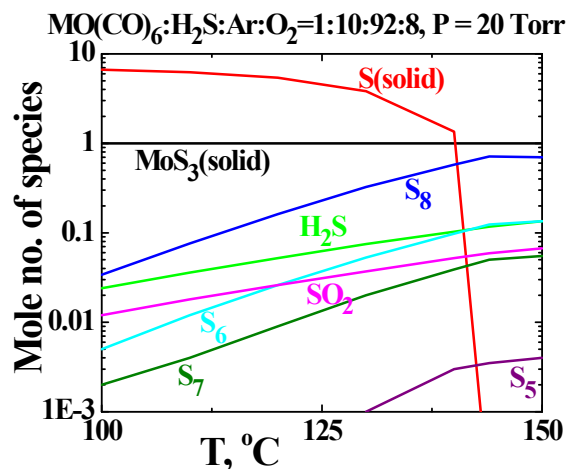

Figure S7. Gaseous and solid species with  $\text{O}_2$  leak in the system at different T.

Table S1. Range of CVD conditions used.

|                                         |                                                                                                                                                     |
|-----------------------------------------|-----------------------------------------------------------------------------------------------------------------------------------------------------|
| Precursor                               | $\text{Mo(CO)}_6$ powder (99.99% purity, Sigma Aldrich)                                                                                             |
| Precursor vapor flow rate               | 7 to 1 sccm                                                                                                                                         |
| Reacting gas                            | $\text{H}_2\text{S}$ (99.5% from Bhoruka)                                                                                                           |
| Reacting gas flow rate                  | 1 to 10 sccm (Electronic mass flow controllers from MKS Instruments used for regulating gas flow)                                                   |
| Carrier gas                             | Ar, $\text{H}_2$ , and Ar/ $\text{H}_2$ mixture                                                                                                     |
| Carrier gas flow rate                   | 100 to 1000 sccm                                                                                                                                    |
| Total reactor pressure $P_{\text{tot}}$ | 20 to 700 Torr (maintained using a bellows-sealed throttle valve connected at the mouth of a rotary vane pump, and read by a capacitance manometer) |
| Substrate temperature $T_{\text{sub}}$  | 350°C to 1050°C                                                                                                                                     |
| Sublimator temperature                  | 100°C to 130°C                                                                                                                                      |
| Substrates used                         | 300 nm thermally grown $\text{SiO}_2$ on Si, c-plane sapphire, and fused quartz                                                                     |
| Duration of Deposition runs             | 40 seconds to 10 minutes                                                                                                                            |

Table S2. Compositional data deduced from XPS spectra.

| <b>MoS<sub>2</sub></b> | <b>Element</b> | <b>Atomic percentage</b> |
|------------------------|----------------|--------------------------|
| 20 Torr, 350C          | Mo 3d          | 1                        |
|                        | S 2s           | 2.18                     |
|                        | C 1s           | 4.07                     |
| 600 Torr, 500C         | Mo 3d          | 1                        |
|                        | S 2s           | 2.34                     |
|                        | C 1s           | 1.98                     |
| 20 Torr, 500C          | Mo 3d          | 1                        |
|                        | S 2s           | 2.10                     |
|                        | C 1s           | 0.98                     |
| 20 Torr, 500C          | Mo 3d          | 1                        |
|                        | S 2s           | 2.34                     |
|                        | C 1s           | 0.8                      |
